# Supplementary material for: Direct Electrophoretic Deposition and Characterization of Thin-Film Membranes Based on Doped BaCeO3 and CeO2 for Anode-Supported Solid Oxide Fuel Cells
Source: MDPI journal article supplement (doi:10.3390/membranes12070682), 2022-06-30
Supplement: s1 [file s1]

# Supplementary Materials

## Direct Electrophoretic Deposition and Characterization of Thin-film Membranes Based on Doped BaCeO<sub>3</sub> and CeO<sub>2</sub> for Anode-supported Solid Oxide Fuel Cells

Elena Pikalova<sup>1,2</sup>, Denis Osinkin<sup>1,2</sup>, Elena Kalinina<sup>3,4\*</sup>

<sup>1</sup> Laboratory of Solid Oxide Fuel Cells, Institute of High Temperature Electrochemistry, Ural Branch of the Russian Academy of Sciences, Yekaterinburg 620137, Russia; e.pikalova@list.ru, osinkinda@mail.ru

<sup>2</sup> Department of Environmental Economics, Graduate School of Economics and Management, Ural Federal University, Yekaterinburg 620002, Russia; e.pikalova@list.ru

<sup>3</sup> Laboratory of Complex Electrophysic Investigations, Institute of Electrophysics, Ural Branch of the Russian Academy of Sciences, Yekaterinburg 620016, Russia; jelen456@yandex.ru

<sup>4</sup> Department of Physical and Inorganic Chemistry, Institute of Natural Sciences and Mathematics, Ural Federal University, Yekaterinburg 620002, Russia; jelen456@yandex.ru

\* Correspondence: jelen456@yandex.ru (E.K.); Tel.: +7-343-267-87-82 (E.K.)

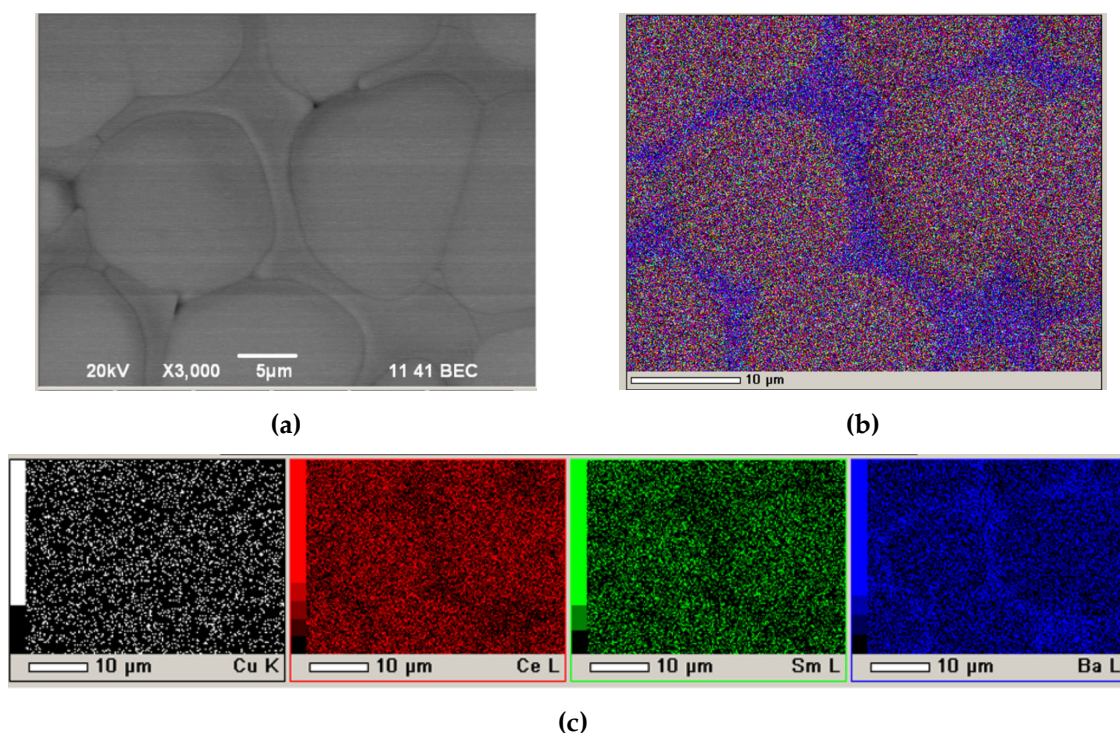

**Figure S1:** The surface of the BCS-CuO/SDC electrolyte layer after sintering at a temperature of 1550 °C for 5 h on the NiO-BCS-CuO anode substrate (BCS-1 sample): (a) SEM image, magnification x3000; (b) Integral map of the elements' distribution; (c) Individual elements' maps.

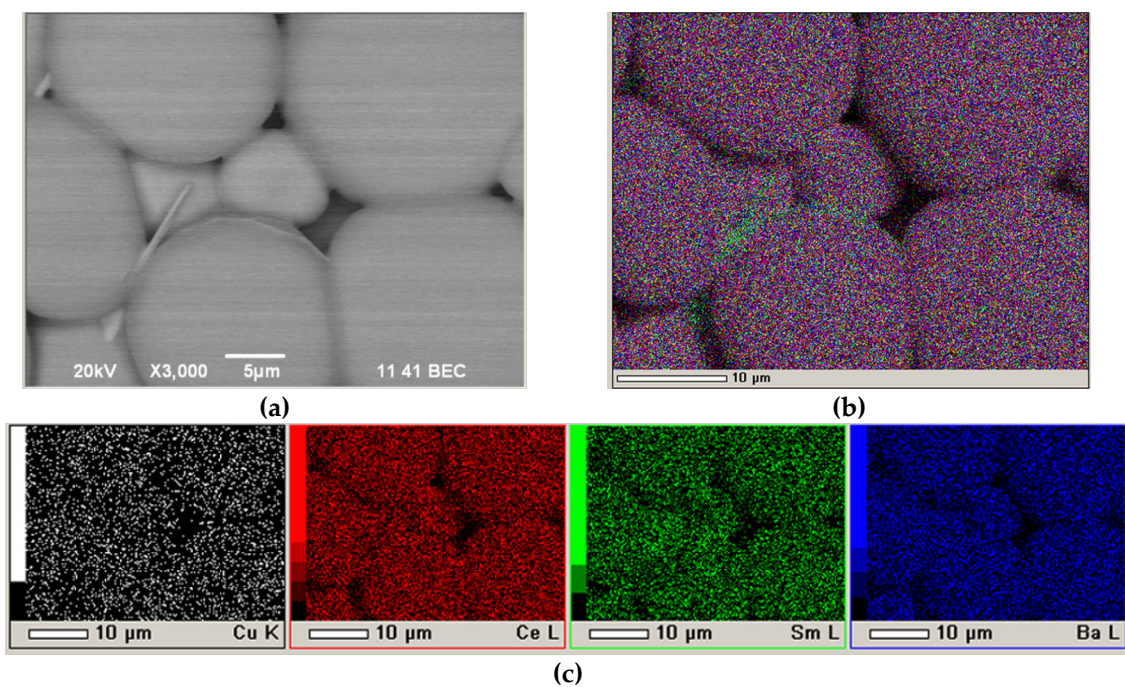

**Figure S2:** The surface of the BCS-CuO/SDC electrolyte layer after sintering at a temperature of 1500 °C for 5 h on the NiO-BCS-CuO anode substrate (BCS-2 sample): (a) SEM image, magnification x3000; (b) Integral map of the elements' distribution; (c) Individual elements' maps.

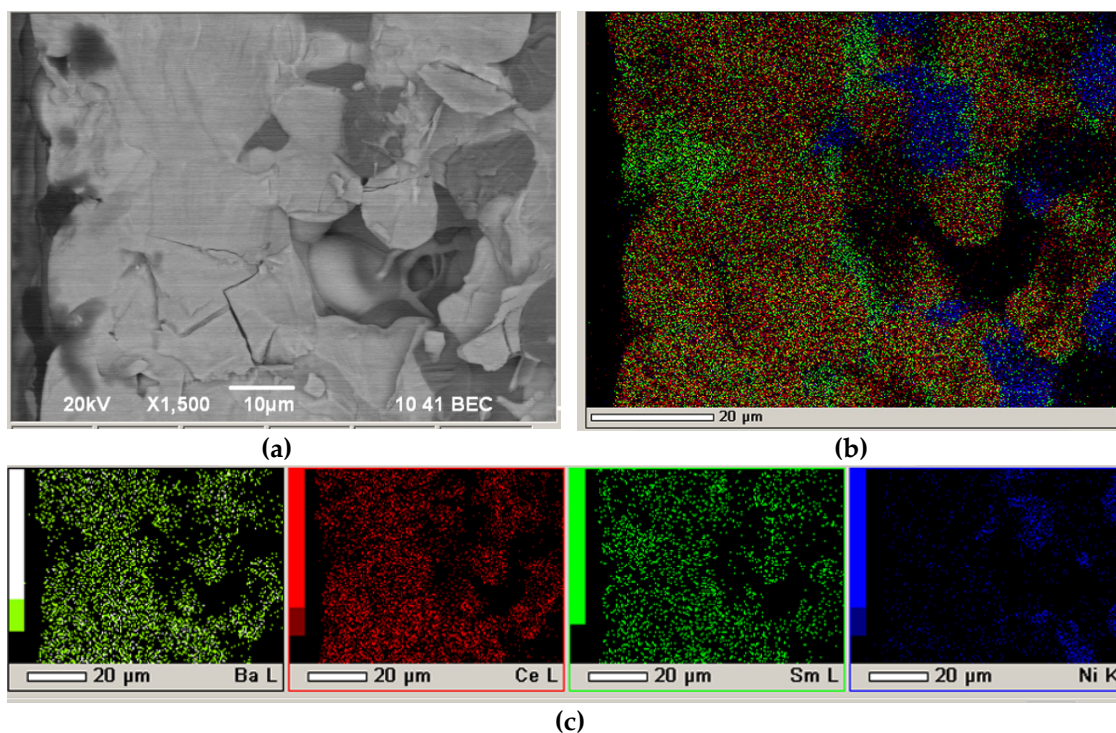

**Figure S3:** Fracture images of the BCS-2 sample with the BCS-CuO/SDC electrolyte layer on the NiO-BCS-CuO anode substrate after sintering at a temperature of 1500 °C for 5 h: (a) SEM image, magnification x1500; (b) Integral map of the elements' distribution; (c) Individual elements' maps.

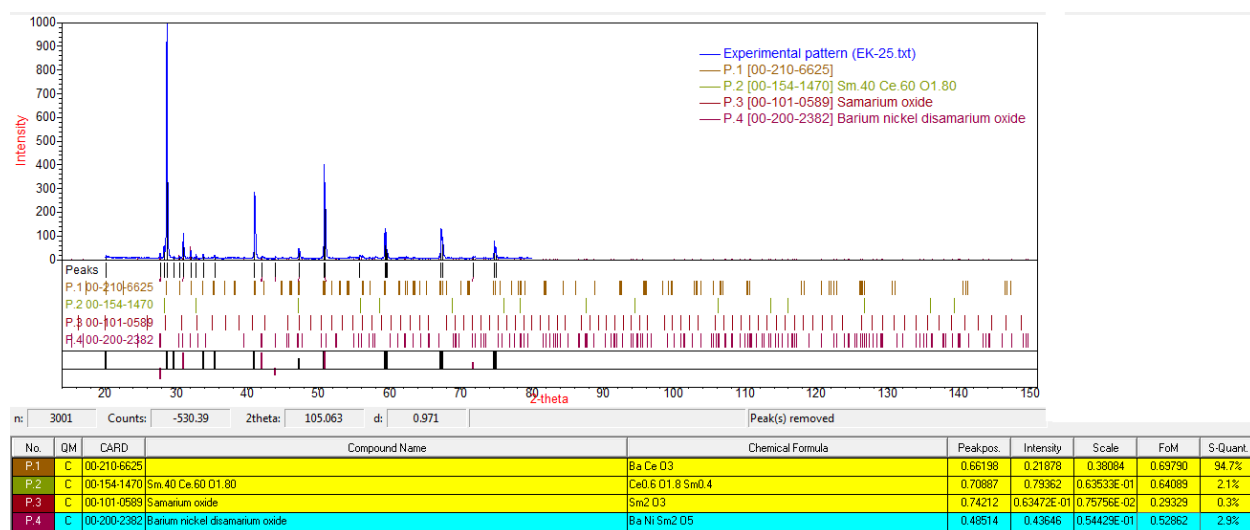

**Figure S4:** XRD-data for the BCS-1 sample, sintered at 1550 °C.

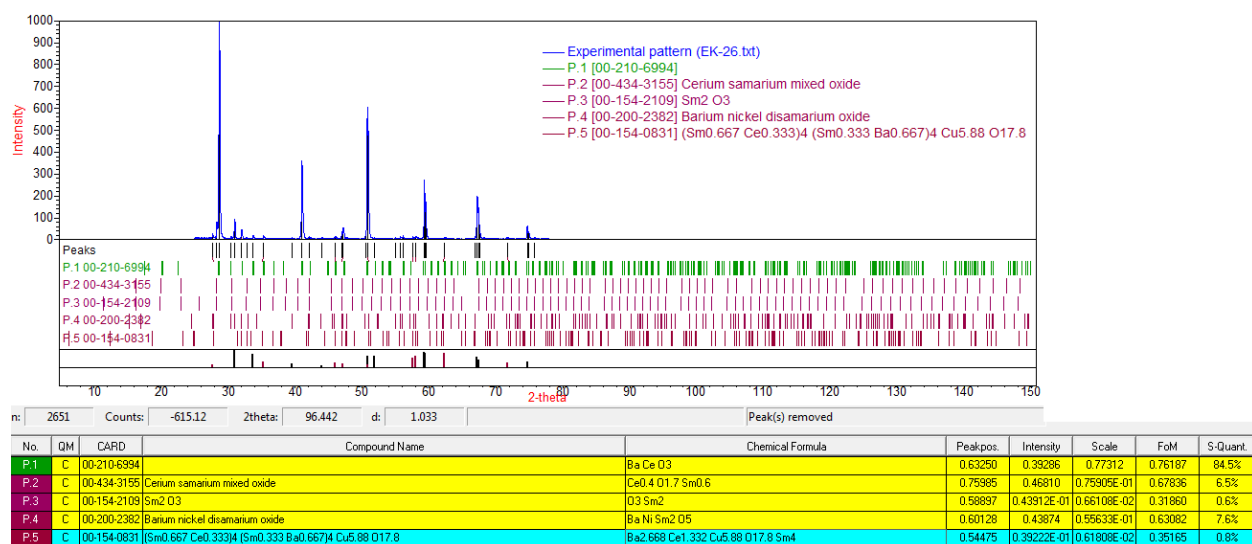

Figure S5: XRD-data for the BCS-2 sample, sintered at 1500 °C

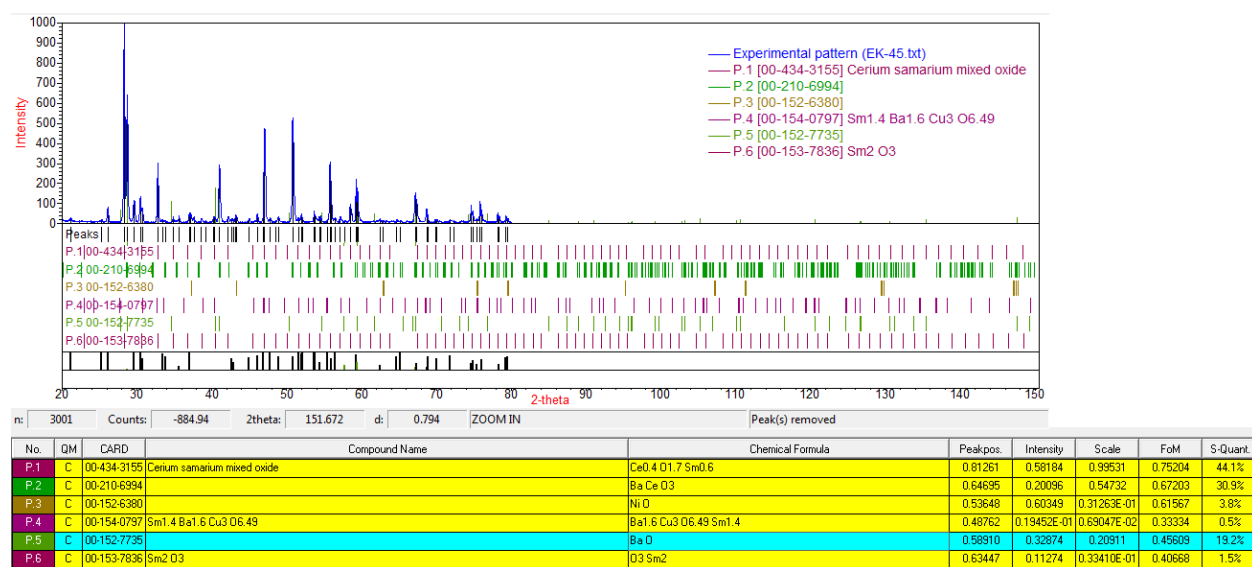

Figure S6: XRD-data for the BCS-4 sample, sintered at 1450 °C

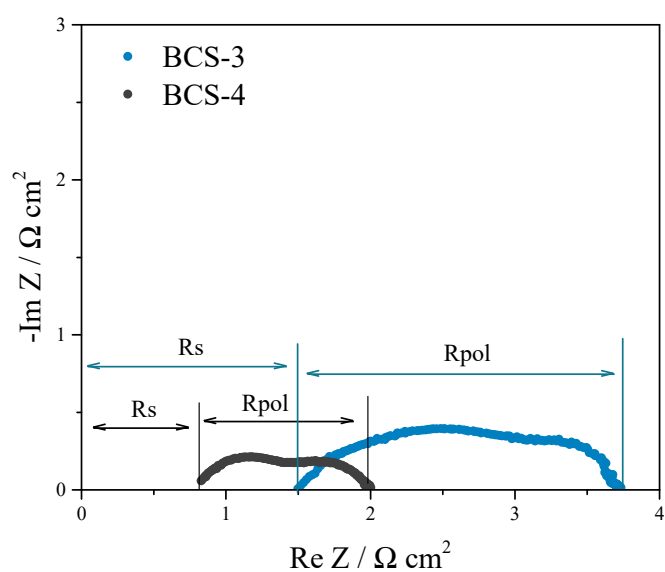

Figure S7: EIS spectra for the BCS-3 and BCS-4 cells collected at 700 °C.
